# Supplementary material for: TaxAss: Leveraging a Custom Freshwater Database Achieves Fine-Scale Taxonomic Resolution
Source: PubMed Central journal article supplement (PMC6126143; doi:10.1128/msphere.00327-18), 2018-09-05
Supplement: sph004182626s3.pdf [file sph004182626s3.pdf]

# README\_marathonas\_validation

*Robin Rohwer*

*1/22/2018*

## Reproduce TaxAss validation using full-length 16S assignments

This readme walks you through the data processing to reproduce “simulated tag data” from full-length 16S sequences. This was used to validate TaxAss.

The process:

- Start with full-length 16S sequences from Marathonas reservoir in Greece.
  - These do not already exist in the FreshTrain database.
- Align the full-length sequences to the FreshTrain manually using Arb.
  - The result of this is zipped in this folder. Likely chimeras were removed.
- Trim the full-length Marathonas sequences to a primer region of choice.
  - That’s where this Readme picks up.
- Assign taxonomy to the short primer regions using TaxAss.
  - When I say “tax!”, you say “ass!”
- Compare the TaxAss assignment results to the “true” classifications known from the full-length alignments.

## Unzip and add TaxAss tax-scripts

Start with `arb-scripts/Marathonas_test/` as your present working directory.

Add the tax-scripts and taxonomy database files to the `add-tax-scripts-and-databases` folder:

```
# all the commands had to get wrapped because msphere doesn't accept html documents.  
# you can get this better-formatted in the TaxAss repo.  
cp ../../tax-scripts/* add-tax-scripts-and-databases  
# unzip your FreshTrain reference (using SILVA v132 for example:)  
cp ../../FreshTrain-files/FreshTrain30Apr2018SILVAv132/FreshTrain30Apr2018SILVAv132.fasta \  
add-tax-scripts-and-databases/custom.fasta  
cp ../../FreshTrain-files/FreshTrain30Apr2018SILVAv132/FreshTrain30Apr2018SILVAv132.taxonomy \  
add-tax-scripts-and-databases/custom.taxonomy  
# add your comprehensive database (formatted according to TaxAss step 0,  
# named general.fasta and general.taxonomy)
```

## Trim full-length sequences to different V regions

Trim the Marathonas full-length 16S sequences to the variable regions amplified by primers in tag data. Do this for several commonly used primer sets that amplify regions of differing lengths. Put each V-region analysis in a different folder.

This uses the shell script `trim_full-length_to_primer_region.sh` and requires the program `mothur` to be on your computer’s path. The syntax to call the script is:

```
./trim_full-length_to_primer_region.sh primers.oligos aligned-fasta-without-filetype \  
name-for-trimmed.fasta
```

note: this is set to correct for a bug in mothur v.1.39.5, so script should be adjusted if a new version fixes bug (says where in script)

### V4 region

```
mkdir v4_mara  
# add all the scripts and reference files  
cp add-tax-scripts-and-databases/* v4_mara/  
cp oligo-files/v4_515F-806R.oligos v4_mara/  
cp oligo-files/ecoli_16S.fasta v4_mara/  
cp trim_full-length_to_primer_region.sh v4_mara/  
# add all the marathonas data files  
cp mara_aligned.fasta v4_mara/  
cp mara_dummy.abund v4_mara/otus.abund  
# trim the fasta file to primer region  
cd v4_mara  
./trim_full-length_to_primer_region.sh v4_515F-806R.oligos mara_aligned otus.fasta  
cd ../
```

### V4-V5 region

```
mkdir v4v5_mara  
# add all the scripts and reference files  
cp add-tax-scripts-and-databases/* v4v5_mara/  
cp oligo-files/v4v5_515FB-926R.oligos v4v5_mara/  
cp oligo-files/ecoli_16S.fasta v4v5_mara/  
cp trim_full-length_to_primer_region.sh v4v5_mara/  
# add all the marathonas data files  
cp mara_aligned.fasta v4v5_mara/  
cp mara_dummy.abund v4v5_mara/otus.abund  
# trim the fasta file to primer region  
cd v4v5_mara  
./trim_full-length_to_primer_region.sh v4v5_515FB-926R.oligos mara_aligned otus.fasta  
cd ../
```

### V3-V4 region

```
mkdir v3v4_mara  
# add all the scripts and reference files  
cp add-tax-scripts-and-databases/* v3v4_mara/  
cp oligo-files/v3v4_341F-805R.oligos v3v4_mara/  
cp oligo-files/ecoli_16S.fasta v3v4_mara/  
cp trim_full-length_to_primer_region.sh v3v4_mara/  
# add all the marathonas data files  
cp mara_aligned.fasta v3v4_mara/  
cp mara_dummy.abund v3v4_mara/otus.abund  
# trim the fasta file to primer region  
cd v3v4_mara  
./trim_full-length_to_primer_region.sh v3v4_341F-805R.oligos mara_aligned otus.fasta  
cd ../
```

## TaxAss the simulated tag data

Run TaxAss on each simulated tag dataset.

### V4 region

```
cd v4_mara
./RunSteps_1-14.sh > termout.txt
./deletemothurbarf.sh termout.txt > terminal_output_1-14.txt
./RunStep_15.sh > termout.txt
./deletemothurbarf.sh termout.txt > terminal_output_15.txt
rm termout.txt
# don't ./RunStep_16.sh, need some intermediate files for analysis
cd ../
```

### V4-V5 region

```
cd v4v5_mara
./RunSteps_1-14.sh > termout.txt
./deletemothurbarf.sh termout.txt > terminal_output_1-14.txt
./RunStep_15.sh > termout.txt
./deletemothurbarf.sh termout.txt > terminal_output_15.txt
rm termout.txt
# don't ./RunStep_16.sh, need some intermediate files for analysis
cd ../
```

### V3-V4 region

```
cd v3v4_mara
./RunSteps_1-14.sh > termout.txt
./deletemothurbarf.sh termout.txt > terminal_output_1-14.txt
./RunStep_15.sh > termout.txt
./deletemothurbarf.sh termout.txt > terminal_output_15.txt
rm termout.txt
# don't ./RunStep_16.sh, need some intermediate files for analysis
cd ../
```

## Compare TaxAss names to full-length “true” names

Use script `compare_full-length_to_taxass_results.R` which can be called from the terminal with this syntax:

```
Rscript compare_full-length_to_taxass_results.R file.arb.tax file.v4.tax file.v4.ids folder.v4
```

| argument     | description                                                                                                                                                                                        |
|--------------|----------------------------------------------------------------------------------------------------------------------------------------------------------------------------------------------------|
| file.arb.tax | <code>mara.taxonomy</code> , the “true” taxonomy determined by aligning the full-length sequence                                                                                                   |
| file.v4.tax  | <code>otus.taxonomy</code> , the taxonomy assigned to simulated tags by TaxAss                                                                                                                     |
| file.v4.ids  | <code>ids.above.98</code> , an intermediate file made by TaxAss that lists the seqIDs above the percent identity cutoff. Note: this is the one that gets deleted if you <code>RunStep_16.sh</code> |
| folder.v4    | a (pre-existing) folder that you want to save the results in                                                                                                                                       |

### V4 region

```
cd v4_mara
mkdir v4_results
Rscript ../compare_full-length_to_taxass_results.R ../mara.silva132.taxonomy \
otus.98.80.80.taxonomy ids.above.98 v4_results
cd ../
```

### V4-V5 region

```
cd v4v5_mara
mkdir v4v5_results
Rscript ../compare_full-length_to_taxass_results.R ../mara.silva132.taxonomy \
otus.98.80.80.taxonomy ids.above.98 v4v5_results
cd ../
```

### V3-V4 region

```
cd v3v4_mara
mkdir v3v4_results
Rscript ../compare_full-length_to_taxass_results.R ../mara.silva132.taxonomy \
otus.98.80.80.taxonomy ids.above.98 v3v4_results
cd ../
```
