# Supplementary material for: TaxAss: Leveraging a Custom Freshwater Database Achieves Fine-Scale Taxonomic Resolution
Source: PubMed Central journal article supplement (PMC6126143; doi:10.1128/msphere.00327-18), 2018-09-05
Supplement: sph004182626sf1.pdf [file sph004182626sf1.pdf]

A

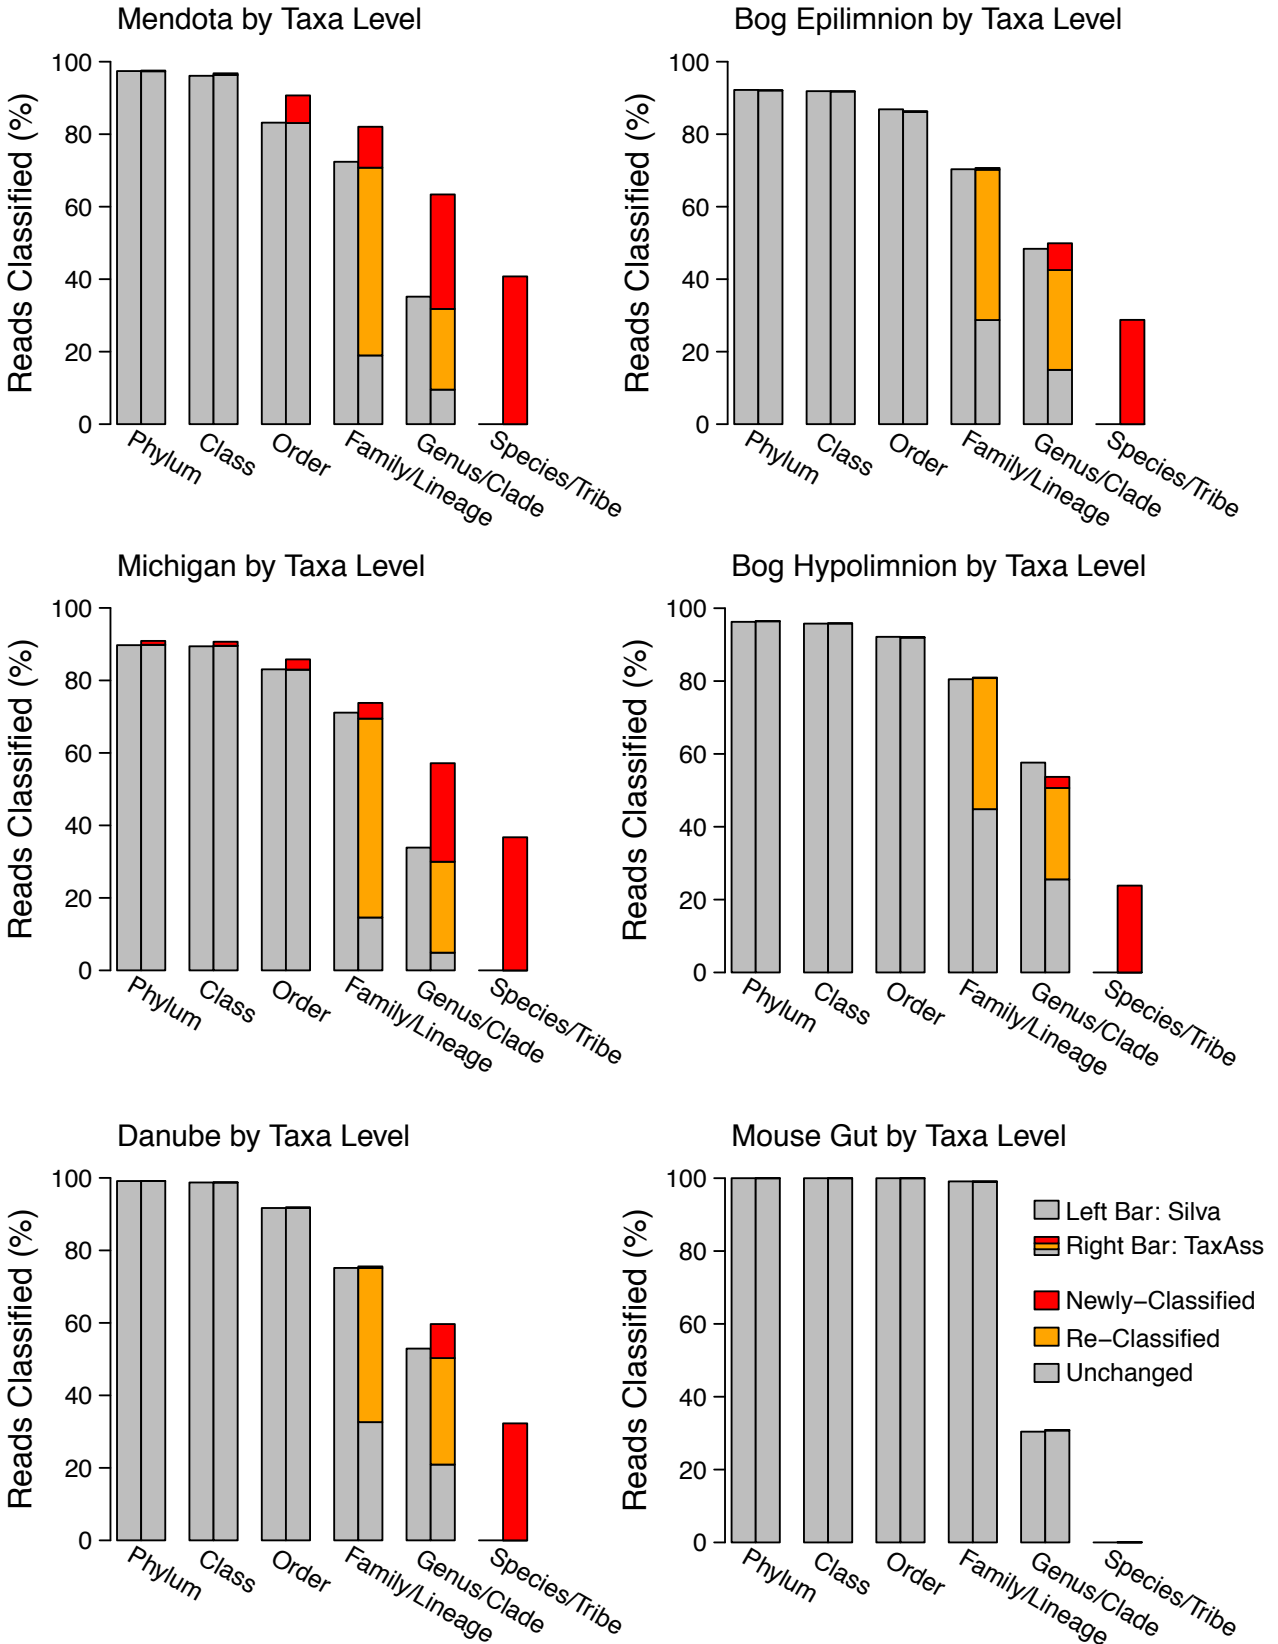

**B**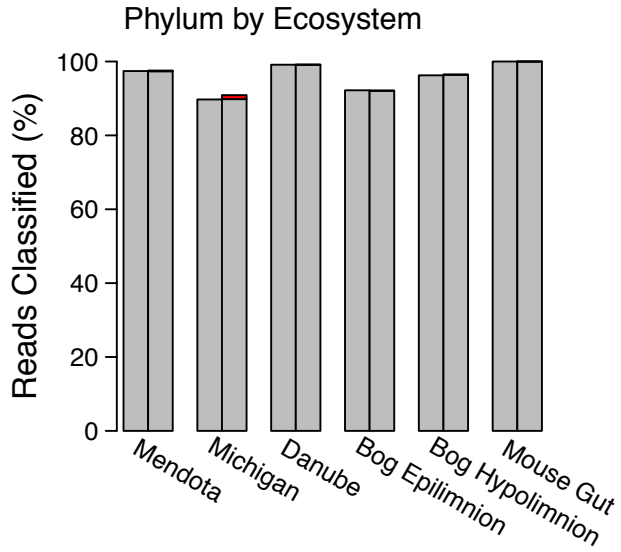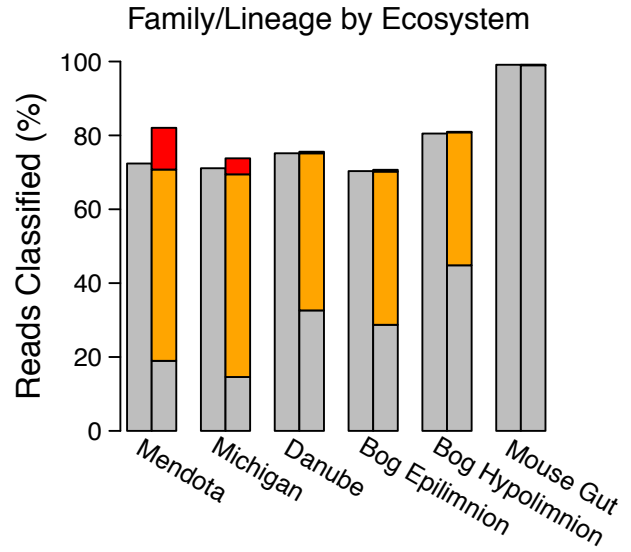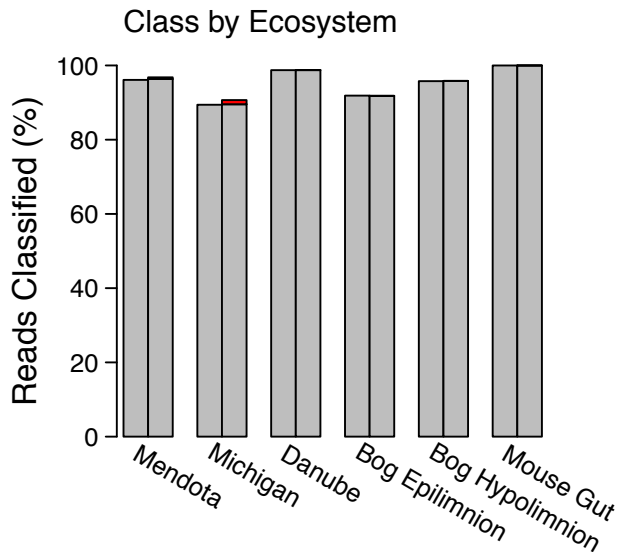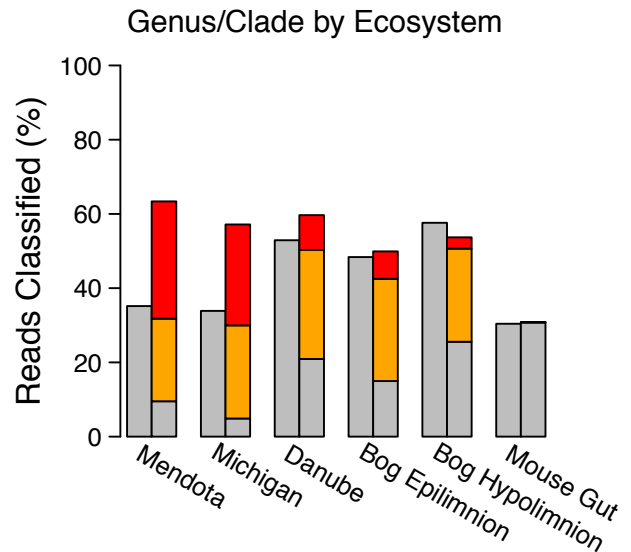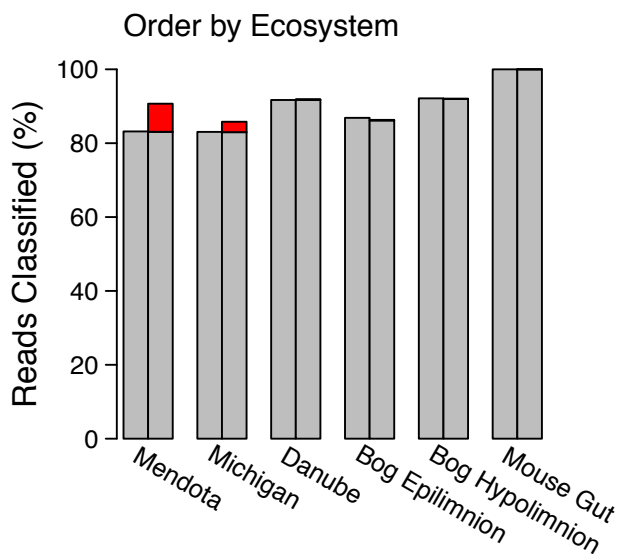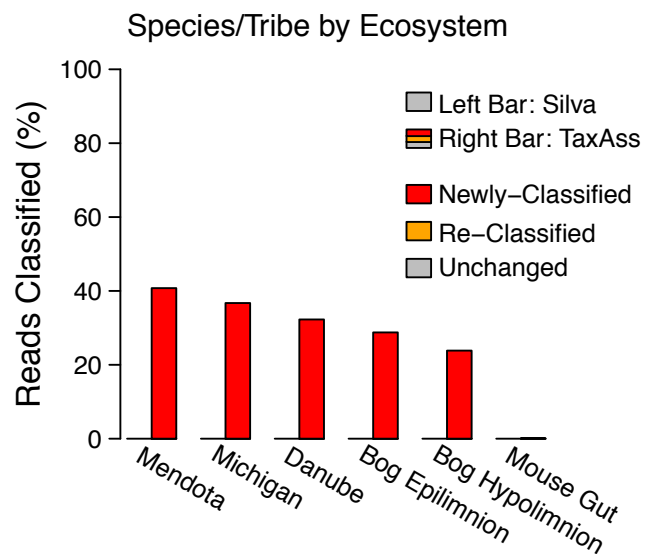

Left Bar: Silva  
Right Bar: TaxAss  
Newly-Classified  
Re-Classified  
Unchanged
