# Supplementary material for: TaxAss: Leveraging a Custom Freshwater Database Achieves Fine-Scale Taxonomic Resolution
Source: PubMed Central journal article supplement (PMC6126143; doi:10.1128/msphere.00327-18), 2018-09-05

# Cyanobacteria Percent Identity Recalculations

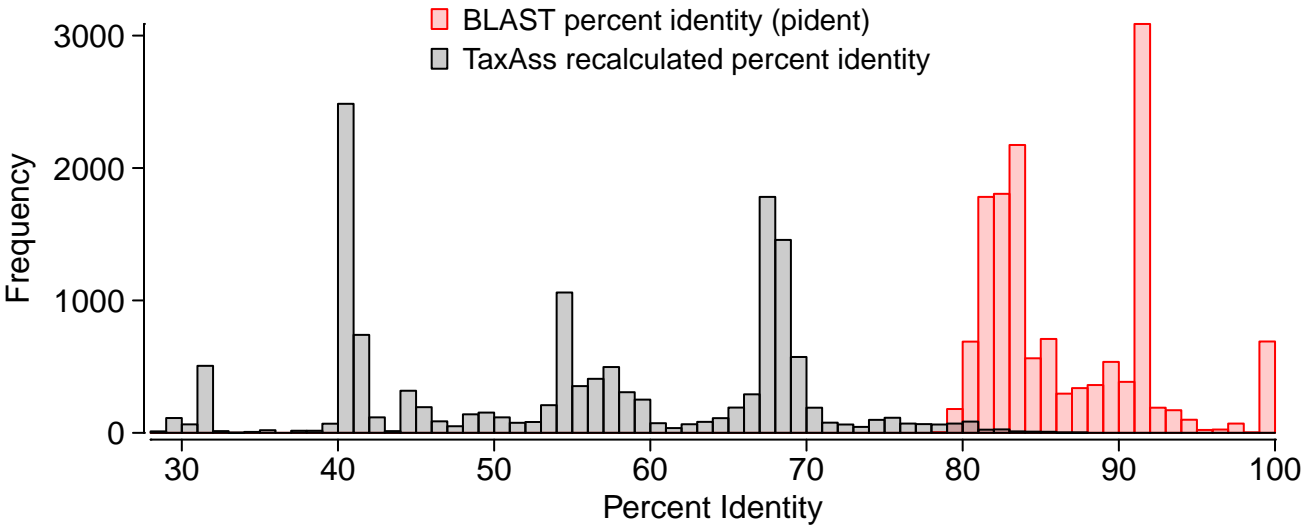

Supplement: sph004182626sf3.pdf [file sph004182626sf3.pdf]
