# Supplementary material for: TaxAss: Leveraging a Custom Freshwater Database Achieves Fine-Scale Taxonomic Resolution
Source: PubMed Central journal article supplement (PMC6126143; doi:10.1128/msphere.00327-18), 2018-09-05
Supplement: sph004182626st1.pdf [file sph004182626st1.pdf]

|                           | Simulated V4 Tags |       |       | Simulated V4-V5 Tags |       |       | Simulated V3-V4 Tags |       |       |
|---------------------------|-------------------|-------|-------|----------------------|-------|-------|----------------------|-------|-------|
|                           | Lineage           | Clade | Tribe | Lineage              | Clade | Tribe | Lineage              | Clade | Tribe |
| Overclassifications       | 0                 | 0     | 3     | 0                    | 1     | 3     | 0                    | 0     | 4     |
| Misclassifications        | 0                 | 2     | 2     | 0                    | 2     | 3     | 0                    | 0     | 2     |
| Incorrectly in FreshTrain | 5                 | 5     | 5     | 1                    | 1     | 1     | 2                    | 2     | 2     |
| Incorrectly in SILVA      | 62                | 62    | 62    | 62                   | 62    | 62    | 58                   | 58    | 58    |
| Underclassifications      | 0                 | 4     | 10    | 0                    | 5     | 7     | 0                    | 6     | 5     |
| Correctly in SILVA        | 110               | 110   | 110   | 114                  | 114   | 114   | 113                  | 113   | 113   |
| Correct Unclassifications | 0                 | 14    | 24    | 0                    | 13    | 20    | 0                    | 15    | 22    |
| Correct Classifications   | 108               | 88    | 69    | 108                  | 87    | 75    | 112                  | 91    | 79    |
