# Supplementary material for: TaxAss: Leveraging a Custom Freshwater Database Achieves Fine-Scale Taxonomic Resolution
Source: PubMed Central journal article supplement (PMC6126143; doi:10.1128/msphere.00327-18), 2018-09-05
Supplement: sph004182626st2.pdf [file sph004182626st2.pdf]

|                        |                       | Percent Classified <sup>a</sup> |        |            | Taxonomic Richness <sup>b</sup> |        |            |
|------------------------|-----------------------|---------------------------------|--------|------------|---------------------------------|--------|------------|
|                        |                       | Silva                           | TaxAss | FreshTrain | Silva                           | TaxAss | FreshTrain |
| <b>Mendota</b>         | <b>Phylum</b>         | 97                              | 98     | 85         | 63                              | 63     | 6          |
|                        | <b>Class</b>          | 96                              | 97     | 84         | 160                             | 162    | 10         |
|                        | <b>Order</b>          | 83                              | 91     | 76         | 387                             | 388    | 31         |
|                        | <b>Family/Lineage</b> | 72                              | 82     | 69         | 700                             | 742    | 57         |
|                        | <b>Genus/Clade</b>    | 35                              | 63     | 56         | 1468                            | 1529   | 94         |
|                        | <b>Species/Tribe</b>  | 0                               | 41     | 41         | 1468                            | 1579   | 147        |
| <b>Michigan</b>        | <b>Phylum</b>         | 90                              | 91     | 72         | 49                              | 48     | 6          |
|                        | <b>Class</b>          | 89                              | 91     | 71         | 136                             | 135    | 10         |
|                        | <b>Order</b>          | 83                              | 86     | 67         | 340                             | 339    | 31         |
|                        | <b>Family/Lineage</b> | 71                              | 74     | 64         | 670                             | 712    | 57         |
|                        | <b>Genus/Clade</b>    | 34                              | 57     | 55         | 1829                            | 1908   | 93         |
|                        | <b>Species/Tribe</b>  | 0                               | 37     | 39         | 1829                            | 1954   | 143        |
| <b>Danube</b>          | <b>Phylum</b>         | 99                              | 99     | 72         | 71                              | 71     | 5          |
|                        | <b>Class</b>          | 99                              | 99     | 71         | 194                             | 192    | 9          |
|                        | <b>Order</b>          | 92                              | 92     | 65         | 500                             | 496    | 30         |
|                        | <b>Family/Lineage</b> | 75                              | 76     | 59         | 891                             | 924    | 56         |
|                        | <b>Genus/Clade</b>    | 53                              | 60     | 46         | 2280                            | 2322   | 92         |
|                        | <b>Species/Tribe</b>  | 0                               | 32     | 36         | 2280                            | 2374   | 148        |
| <b>Bog Epilimnion</b>  | <b>Phylum</b>         | 92                              | 92     | 72         | 60                              | 57     | 5          |
|                        | <b>Class</b>          | 92                              | 92     | 66         | 139                             | 136    | 9          |
|                        | <b>Order</b>          | 87                              | 86     | 57         | 319                             | 312    | 30         |
|                        | <b>Family/Lineage</b> | 70                              | 71     | 55         | 554                             | 585    | 53         |
|                        | <b>Genus/Clade</b>    | 48                              | 50     | 42         | 1112                            | 1147   | 82         |
|                        | <b>Species/Tribe</b>  | 0                               | 29     | 32         | 1112                            | 1186   | 124        |
| <b>Bog Hypolimnion</b> | <b>Phylum</b>         | 96                              | 96     | 72         | 60                              | 58     | 5          |
|                        | <b>Class</b>          | 96                              | 96     | 61         | 145                             | 138    | 9          |
|                        | <b>Order</b>          | 92                              | 92     | 50         | 324                             | 319    | 30         |
|                        | <b>Family/Lineage</b> | 80                              | 81     | 49         | 568                             | 596    | 54         |
|                        | <b>Genus/Clade</b>    | 58                              | 54     | 35         | 1062                            | 1086   | 83         |
|                        | <b>Species/Tribe</b>  | 0                               | 24     | 25         | 1062                            | 1125   | 126        |
| <b>Mouse Gut</b>       | <b>Phylum</b>         | 100                             | 100    | 53         | 18                              | 18     | 5          |
|                        | <b>Class</b>          | 100                             | 100    | 49         | 28                              | 28     | 9          |
|                        | <b>Order</b>          | 100                             | 100    | 1          | 60                              | 60     | 22         |
|                        | <b>Family/Lineage</b> | 99                              | 99     | 0          | 102                             | 115    | 35         |
|                        | <b>Genus/Clade</b>    | 30                              | 31     | 0          | 180                             | 188    | 41         |
|                        | <b>Species/Tribe</b>  | 0                               | 0      | 0          | 180                             | 196    | 51         |
